# Supplementary material for: Functional Cardiomyocytes Derived from Isl1 Cardiac Progenitors via Bmp4 Stimulation
Source: PubMed Central journal article supplement (PMC4270687; doi:10.1371/journal.pone.0110752), 2014-12-18

**Figure S5**

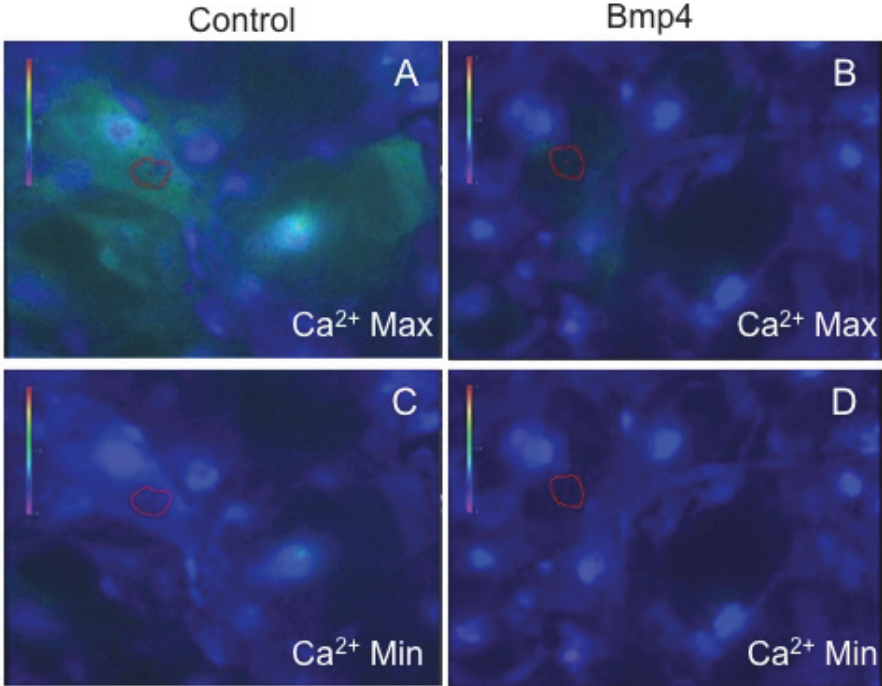

Supplement: pone.0110752.s005.pdf [file pone.0110752.s005.pdf]
